# Supplementary material
Source: HighWire-hosted journal article supplement (https://jme.bmj.com/content/45/9/608)
Supplement: inline-supplementary-material-1 [file inline-supplementary-material-1.docx]

| **Determinants OR**  **Appendix**. Odds ratio for determinants for perceiving more or less importance for the MCD- outcome compared with the other subgroups. Odds ratio (OR) were considered clinically relevant if OR<0.5 or > 2 (except age, calculated for each year). |  | **HEALTHCARE DOMAINS** | | | | **PROFESSIONS** | | | | **GENDER/AGE** | |
| --- | --- | --- | --- | --- | --- | --- | --- | --- | --- | --- | --- |
| **Outcomes** | **Netherlands vs Scandinavia** | **Psychia-tric care vs other** | **Somat care vs others** | **Community care vs other** | **Mentdisab vs other** | **Nurse assistents vs other** | **Nurses vs other** | **Physi-cians vs other** | **Thera-pists vs other** | **Female versus male** | **Older age vs younger age** |
| **ENHANCED COLLABORATION** |
| More open communication among co-workers | **0.29**** | **0.32**** | NS | NS | NS | NS | NS | NS | **0.31**†** | **0.27** †** | **1.05** †** |
| Better mutual understanding of each other’s reasoning and acting | NS | **0.27***** | **3.26**** | NS | NS | NS | NS | **0.33*** | **0.39**** | **0.23***** | NS |
| Greater opportunity for everyone to have their say | **0.15**†*** | **0.26***** | 1.68** | **3.99***** | NS | **5.45***** | NS | 0.5* | NS | 0.36†*** | **1.03**** |
| I and my co-workers manage disagreements more constructively | **0.40**†*** | 0.58* | NS | **2.55*** | NS | NS | NS | **0.45**†* | NS | NS | **1.03**†** |
| Enhanced mutual respect amongst co-workers | **0.14**†*** | **0.30***** | **2.03*** | **2.18*** | NS | **+inf***** | NS | NS | 0.44** | 0.40*** | **1.03**** |
| **ENHANCED EMOTIONAL SUPPORT** |  |  |  |  |  |  |  |  |  |  |  |
| Enables me to better manage the stress caused by ethically difficult situations | **0.21**†*** | **0.35***** | 1.93** | **2.35**** | **0.49*** | **5.59***** | 1.68** | **0.35**†*** | **0.32**†*** | 0.32†*** | **1.02**** |
| I feel more secure to express doubts or uncertainty reg ethically diff. sit. | **0.31***** | **0.37***** | NS | **3.15***** | NS | **5.42***** | NS | NS | NS | **0.35***** | NS |
| Enhances possibility to share difficult emotions and thoughts | **0.37**†*** | **0.36***** | 1.78* | NS | NS | **3.21**** | NS | NS | NS | **0.31**†*** | NS |
| Increases awareness of my own emotions regarding ethically diff. situations | **0.21***** | **0.45***** | NS | **2.11***** | NS | **3.30***** | NS | NS | 0.48** | 0.50** | **1.03**** |
| Strengthens my self-confidence when managing ethically difficult situations | **0.21**†*** | **0.31***** | NS | **3.61***** | NS | **6.42***** | NS | **0.40**** | 0.61* | **0.28**†******* | NS |
| **IMPROVED MORAL REFLEXIVITY** |  |  |  |  |  |  |  |  |  |  |  |
| Develops my skills to analyse ethically difficult situations | **0.43**** | 0.52* | NS | **4.96**** | NS | NS | NS | NS | NS | NS | NS |
| I see the ethically difficult situations from different perspectives | **0.34***** | **0.40***** | NS | **2.79*** | NS | NS | NS | NS | NS | **0.31***** | **1.03*** |
| Increases my awareness of the complexity of ethically difficult situations | **0.27***** | 0.52** | NS | **2.91***** | NS | **4.12***** | NS | **0.43**** | 0.51** | **0.38***** | **1.04**†*** |
| Enhances my understanding of ethical theories | 0.69* | NS | NS | 1.92** | NS | **4.54**†******* | NS | **0.36**†*** | NS | 0.66* | **1.03**†** |
| Develops my ability to identify the core ethical question in the diff. sit. | 0.53** | **0.49**** | NS | **3.29**** | NS | **3.16**** | 0.64* | NS | NS | **0.46**** | **1.03**** |
| **IMPROVED MORAL ATTITUDE** |  |  |  |  |  |  |  |  |  |  |  |
| Gives me more courage to express my ethical standpoint | **0.29***** | **0.42***** | 1.54* | **2.37**** | 0.53* | **3.06***** | NS | **0.40**†** | NS | **0.44***** | NS |
| I listen more seriously to others’ opinions | **0.18***** | **0.42***** | NS | **3.23***** | NS | **8.16***** | NS | 0,51* | **0.38***** | 0,50** | **1.03***** |
| I gain more clarity about my own responsibility in the ethically diff. sit. | **0.32**†*** | **0.36***** | NS | **2.98**** | NS | **5.28***** | NS | **0.41**†** | NS | **0.29**†*** | NS |
| I become more aware of my preconceived notions | **0.19**†*** | **0.32***** | NS | **3.06***** | NS | **4.29***** | NS | **0.32***** | NS | **0.37**†*** | NS |
| I understand better what it means to be a good professional | **0.26***** | 0.53** | NS | **2.31**** | NS | **6.16**†*** | NS | **0.32**†*** | NS | **0.45***** | NS |
| **CONCRETE RESULTS** |  |  |  |  |  |  |  |  |  |  |  |
| Consensus is gained amongst co-workers in how to manage the ethic diff. sit. | NS | NS | NS | NS | NS | NS | NS | NS | NS | NS | NS |
| Enables me and my co-workers to decide on concrete actions in order to manage the ethically difficult situations | **0.47**** | NS | NS | NS | NS | NS | NS | NS | NS | NS | NS |
| Find more courses of actions in order to manage the ethically diff. sit. | **0.34**†*** | NS | NS | **3.38**** | **2.60**** | **2.69*** | NS | **0.45*** | NS | **0.42**** | **1.02*** |
| **ON ORGANIZATIONAL LEVEL** |  |  |  |  |  |  |  |  |  |  |  |
| I and my co-workers examine more critically the existing practice/ policies | NS | NS | NS | NS | NS | NS | NS | NS | NS | NS | NS |
| Contributes to the development of practice/policies in the workplace | **0.38**†*** | **0.43***** | NS | **3.33**** | NS | **3.30**** | NS | **0.45*** | **0.49**** | **0.39**†*** | **1.03**†** |
| I and my co-workers become more aware of recurring ethically diff. sit. | **0.28***** | **0.37***** | NS | **3.37**** | NS | **4.95**** | NS | NS | 0.51* | **0.31***** | NS |

**†** *= also significant in multivariable logistic-regression NS= not significant p>0.05 * = p < 0.05 ** = p< 0.01 *** = p< 0.001*
